# Supplementary material
Source: publisher figshare collection journal article supplement (https://frontiersin.figshare.com/ndownloader/files/22816073)
Supplement: Supplementary file [file 22816073]

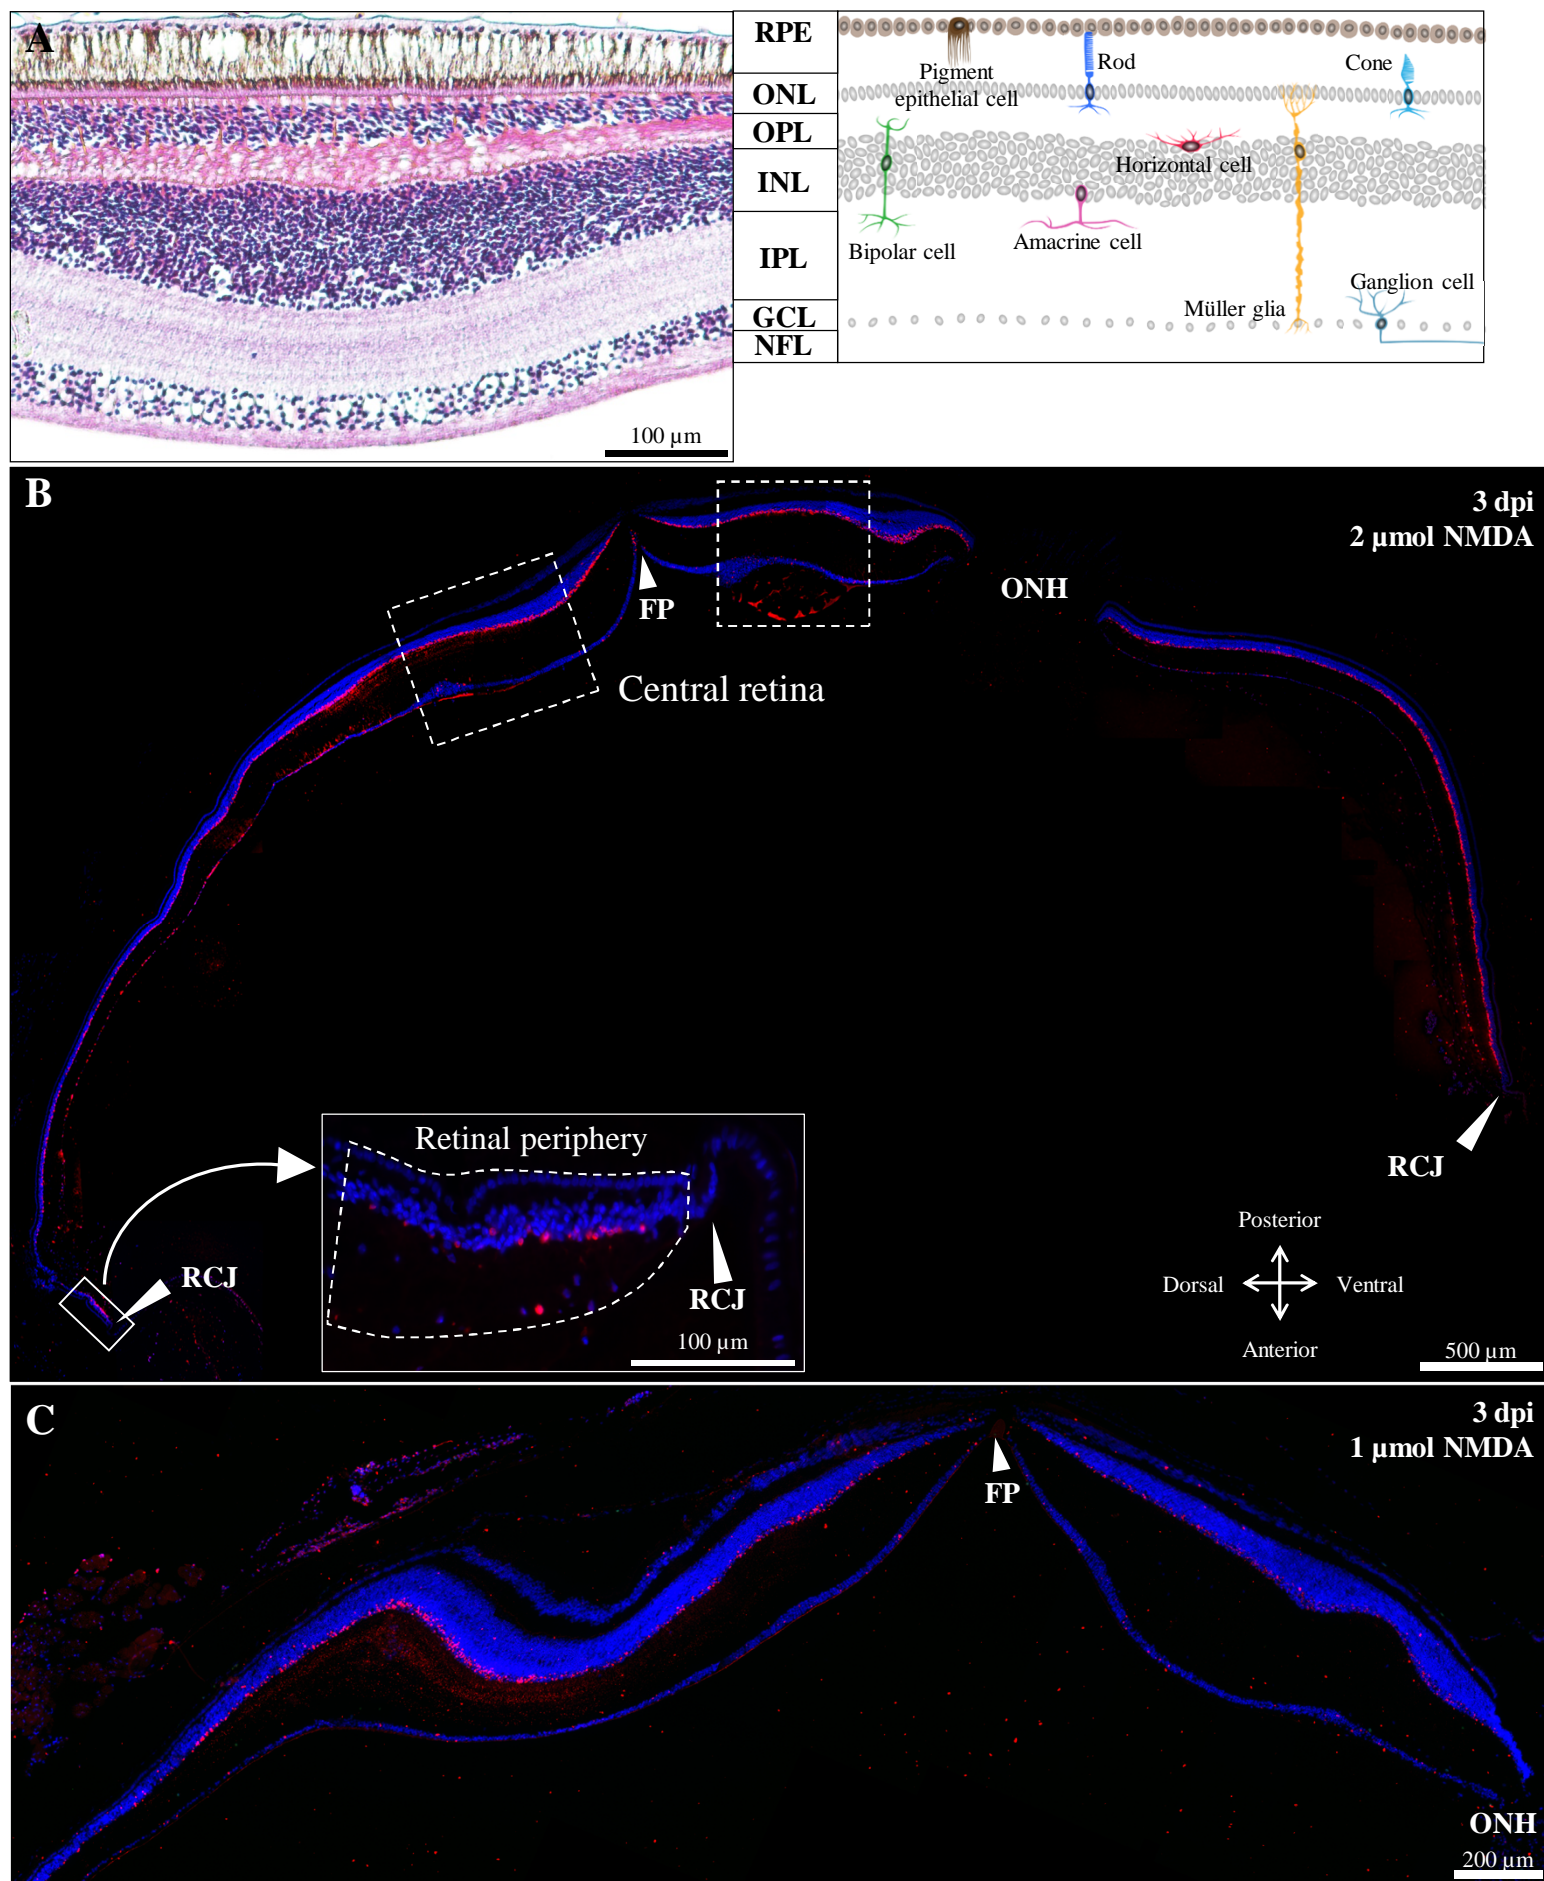

**Supplementary Figure S1.** (A) Hematoxylin and Eosin histological staining (left) and schematic representation (right) of central retina morphology in bearded dragon. The different layers (RPE, retinal pigment epithelium; ONL, outer nuclear layer; OPL, outer plexiform layer; INL, inner nuclear layer; IPL, inner plexiform layer; GCL, ganglion cell layer; NFL, nerve fiber layer) and cell types are indicated. (B,C) TUNEL apoptotic assay (red staining) in the retina of bearded dragon eyes treated with 2 (B) or 1 (C)  $\mu$ mol of NMDA at 3 days post-injection (dpi). The positions of the pseudostratified retinociliary junction (RCJ), foveal pit (FP), and optic nerve head (ONH) are shown. Insets indicate the central and peripheral retina areas used for cell quantification.
